# Supplementary material
Source: Springer Nature journal article supplement (https://www.springermedizin.de/resource/supplementary/13019_2013_1427_MOESM1_ESM.pdf/9640642)
Supplement: MOESM1 [file 9640642]

| Model  | Study name  | Statistics for each study |                |          |             |             |         |         | Std diff in means and 95% CI |       |      |      |      |  |
|--------|-------------|---------------------------|----------------|----------|-------------|-------------|---------|---------|------------------------------|-------|------|------|------|--|
|        |             | Std diff in means         | Standard error | Variance | Lower limit | Upper limit | Z-Value | p-Value | -1.00                        | -0.50 | 0.00 | 0.50 | 1.00 |  |
|        | Chenshaolia | 0.268                     | 0.240          | 0.058    | -0.203      | 0.740       | 1.116   | 0.265   |                              |       |      |      |      |  |
|        | Labriolle   | 0.267                     | 0.174          | 0.030    | -0.074      | 0.608       | 1.534   | 0.125   |                              |       |      |      |      |  |
|        | Prasad      | 0.053                     | 0.063          | 0.004    | -0.071      | 0.176       | 0.837   | 0.402   |                              |       |      |      |      |  |
|        | Suero       | 0.061                     | 0.051          | 0.003    | -0.039      | 0.162       | 1.198   | 0.231   |                              |       |      |      |      |  |
|        | Yixianhua   | 0.044                     | 0.084          | 0.007    | -0.121      | 0.209       | 0.525   | 0.599   |                              |       |      |      |      |  |
|        | Valenti     | 0.217                     | 0.100          | 0.010    | 0.021       | 0.413       | 2.174   | 0.030   |                              |       |      |      |      |  |
|        | Finci       | 0.000                     | 0.141          | 0.020    | -0.277      | 0.277       | 0.000   | 1.000   |                              |       |      |      |      |  |
|        | Hoye        | 0.084                     | 0.071          | 0.005    | -0.055      | 0.224       | 1.187   | 0.235   |                              |       |      |      |      |  |
|        | Angioi      | 0.095                     | 0.142          | 0.020    | -0.183      | 0.372       | 0.670   | 0.503   |                              |       |      |      |      |  |
|        | Ivanhoe     | 0.097                     | 0.096          | 0.009    | -0.092      | 0.286       | 1.002   | 0.316   |                              |       |      |      |      |  |
|        | Liubinwei   | 0.144                     | 0.314          | 0.098    | -0.471      | 0.758       | 0.458   | 0.647   |                              |       |      |      |      |  |
|        | Olivari     | 0.138                     | 0.122          | 0.015    | -0.102      | 0.378       | 1.128   | 0.259   |                              |       |      |      |      |  |
|        | Drozd       | 0.072                     | 0.098          | 0.010    | -0.119      | 0.264       | 0.740   | 0.459   |                              |       |      |      |      |  |
|        | Noguchi     | 0.000                     | 0.135          | 0.018    | -0.265      | 0.265       | 0.000   | 1.000   |                              |       |      |      |      |  |
|        | Zhuyanbin   | 0.154                     | 0.205          | 0.042    | -0.247      | 0.555       | 0.752   | 0.452   |                              |       |      |      |      |  |
| Fixed  |             | 0.083                     | 0.025          | 0.001    | 0.034       | 0.132       | 3.306   | 0.001   |                              |       |      |      |      |  |
| Random |             | 0.083                     | 0.025          | 0.001    | 0.034       | 0.132       | 3.306   | 0.001   |                              |       |      |      |      |  |
